# Supplementary material for: Topological effect of an intramolecular split G-quadruplex on thioflavin T binding and fluorescence light-up
Source: Royal Society of Chemistry journal article supplement (doi:10.1039/d3sc06862e), 2024-01-01
Supplement: d3sc06862e1.pdf [file d3sc06862e1.pdf]

## Supporting Information for

# Topological effect of intramolecular split G-quadruplex on Thioflavin T binding and fluorescence light-up

Mengmeng Lv,<sup>a,b</sup> Jiangtao Ren,<sup>b\*</sup> Erkang Wang<sup>a,b\*</sup>

<sup>a</sup> College of Chemistry, Jilin University, Changchun, Jilin 130012, China.

<sup>b</sup> State Key Laboratory of Electroanalytical Chemistry, Changchun Institute of Applied Chemistry, Chinese Academy of Sciences, Changchun, Jilin 130022, China.

\* Corresponding author E-mail: jiangtaoren@ciac.ac.cn; ekwang@ciac.ac.cn

### Table of contents:

- Oligonucleotides used in this study. (Table S1)
- The gene fragments of this work (Table S2).
- Eleven Intra-SG structures (*S1-S11*) derived from *T30695* G-quadruplex. (Figure S1)
- Fluorescence responses of ThT with different types of DNA strands (*S8*, *C/S8* or *C/C'*). (Figure S2)
- UV-vis spectra of ThT incubated with different Intra-SG strands or *C*/Intra-SG hybrids. (Figure S3)
- Fluorescence spectra of different ThT/Intra-SG systems (*S8Ha'*, *S8Hb'*, *S8Hc'* and *S8Hd'*). (Figure S4)
- CD spectra and normalized UV-melting profiles of *S8Ha'* without or with *Ha*. (Figure S5)
- The fluorescence intensity of ThT/Intra-SG in the presence of target or different target variants generated through grafting different numbers of A or T bases at the 5' or 3' end. (Figure S6)
- The fluorescence intensity of ThT/*S8Ha'* with *R11* or *R11* variants generated through grafting different numbers (*k*) of T bases at the 3' terminus (*RTk*). (Figure S7)

- The fluorescence intensity of ThT/*S8Ha'* in the presence of *Ha* or different *Ha* variants generated through tailoring different numbers of bases from the 5' end (*Ly*). (**Figure S8**)
- Fluorescence spectra of different ThT/Intra-SG systems (*S8Ra'*, *S8Rb'*, *S8Rc'*, *S8Rd'*, *S8Re'* and *S8Rf'*). (**Figure S9**)
- Fluorescence data on the topological effect study of ThT/*S8Ra'* system. (**Figure S10**)

## Experimental section

**Asymmetric PCR amplification (A-PCR).** The gene sequences of Hepatitis B (GenBank accession number AB116094), Ebola (GenBank accession number KY786026.1) and Nova (GenBank accession number KB270442.1) viruses can be retrieved from the GenBank database of the National Center for Biotechnology Information. A-PCR primers including a forward primer (*FP*) and a reverse primer (*RP*) were designed for HBV fragment (*HF*) using the Snap gene sequence analysis and design software.

As for the developed LABP (Figure 6D-E), an optimum molar ratio of 10:1 was adopted. Each A-PCR sample (20  $\mu$ L) was prepared by mixing 10  $\mu$ L of Taq PCR Master Mix consisting of Taq DNA polymerase, dNTPs mix and  $MgCl_2$ , 3.6  $\mu$ L of *FP* (20  $\mu$ M), 1.8  $\mu$ L of *RP* (4  $\mu$ M), and 5  $\mu$ L of target template (*HF*, *EF* or *NF*) of different concentrations. The template was replaced by buffer as a negative control. All the reaction mixtures were subjected to repeated cycles of 10 s at 98°C, 15 s at 60°C, and 15 s at 72°C, on an Applied Biosystems Veriti Thermal Cycler (Life Technologies Holdings Pte Ltd., Singapore). The A-PCR conditions used included an initial denaturation step at 98°C for 30 s, followed by 35 cycles of denaturation at 98°C for 10 s, annealing at 60°C for 15 s, and an extension at 72°C for 15 s. In the end, there was a final extension step at 72°C for 7 min. The A-PCR amplicons were subjected to subsequent ligation and RCA reaction.

**Ligation and RCA reaction.** 20  $\mu$ L of A-PCR product was mixed with 2  $\mu$ L of T4 DNA ligase reaction buffer (400 mM Tris-HCl, pH 7.8, 100 mM  $MgCl_2$ , 100 mM DTT, 5 mM ATP and 50% PEG4000), 2.5  $\mu$ L of padlock (*Pa*, 3.2  $\mu$ M) and 0.75  $\mu$ L of ddH<sub>2</sub>O.

After annealing for 5 min at 75°C, 2 µl of T4 DNA ligase (4 U/µl) was added into the mixture, and the ligation reaction proceeded for 2 h at 37°C. Subsequently, the polymerization reaction was initiated by adding 1.75 µL of dNTPs (10 mM), 2 µL of phi29 DNA polymerase (5 U/µL) and 4 µL of phi29 buffer (330 mM Tris-HCl, 660 mM KCl, 100 mM MgCl<sub>2</sub>, 1% (v/v) Tween20 and 10 mM DTT, pH 7.5) into the ligation solution. After 2 h at 37°C, it was terminated through a thermal treatment for 5 min at 95°C.

**Signal transduction.** 44 µL of Tris/Mg buffer (25 mM Tris-HCl buffer, 10 mM Mg<sup>2+</sup>, pH 8.0) was added to each RCA sample. After sonication for 10 min at room temperature, *S8Ra'* (10 µL, 9 µM) in Tris/K buffer and *Rv/BL* conversion probe (5 µL, 24 µM) in Tris/Mg buffer were added and incubated for 1 h at room temperature. Finally, the solution was mixed with ThT (6 µL, 250 µM) and 204 µL of Tris/Mg buffer with 30 mM K<sup>+</sup>, and then fluorescence spectra were collected after 20 min of incubation at room temperature.

**Gel electrophoresis.** As for agarose gel electrophoresis in Figure 6A, an agarose gel (3% (w/v)) was prepared in 1×TAE buffer (40 mM Tris-acetic acid, 2 mM EDTA, pH 7.5). 10 µL of each A-PCR sample was mixed with 4 µL of loading buffer (1×TAE with 36% glycerol) and loaded into the gel. As for denaturing polyacrylamide gel electrophoresis in Figure 6B, a polyacrylamide gel (12% (w/v)) was prepared within 1×TBE buffer with urea (89 mM Tris, 89 mM boric acid, 2 mM EDTA and 7 M urea, pH 8.3). 5 µL of each ligation sample was mixed with 2 µL of loading buffer (1×TBE with 7 M urea and 36% glycerol, pH 8.3) and loaded into the gel. As for native polyacrylamide gel electrophoresis in Figure 6C, a polyacrylamide gel (12% (w/v)) was prepared within 1×TBE buffer. 5 µL of each sample was mixed with 2 µL of loading buffer (1×TBE with 36% glycerol, pH 8.3) and loaded into the gel. All the gels were run at 60 V for 80-100 min, stained with Gel-Red (0.2%) for 40 min and photographed using a fluorescence imaging system, iBright™ FL1000 (Thermo Fisher Scientific, USA).

**Table S1.** Oligonucleotides used in this study. (Note: Spacer sequences are indicated by italic letter. The mutated bases were indicated by red letters.)

| Oligo         | Sequence (5' to 3')                           |
|---------------|-----------------------------------------------|
| <i>T30695</i> | GGGTGGGTGGGTGGGT                              |
| <i>S1</i>     | G <i>TTCTTTTCTTTTCTTTTCTT</i> GGTGGGTGGGTGGGT |
| <i>S2</i>     | GG <i>TTCTTTTCTTTTCTTTTCTT</i> GTGGGTGGGTGGGT |
| <i>S3</i>     | GGG <i>TTTCTTTTCTTTTCTTTTCTT</i> GGTGGGTGGGT  |
| <i>S4</i>     | GGGTG <i>TTCTTTTCTTTTCTTTTCTT</i> GGTGGGTGGGT |
| <i>S5</i>     | GGGTGG <i>TTCTTTTCTTTTCTTTTCTT</i> GTGGGTGGGT |
| <i>S6</i>     | GGGTGGGT <i>TTCTTTTCTTTTCTTTTCTT</i> GGTGGGT  |
| <i>S7</i>     | GGGTGGGTG <i>TTCTTTTCTTTTCTTTTCTT</i> GGTGGGT |
| <i>S8</i>     | GGGTGGGTGG <i>TTCTTTTCTTTTCTTTTCTT</i> GTGGGT |
| <i>S9</i>     | GGGTGGGTGGGT <i>TTCTTTTCTTTTCTTTTCTT</i> GGT  |
| <i>S10</i>    | GGGTGGGTGGGTG <i>TTCTTTTCTTTTCTTTTCTT</i> GGT |
| <i>S11</i>    | GGGTGGGTGGGTGG <i>TTCTTTTCTTTTCTTTTCTT</i> GT |
| <i>C'</i>     | TTCTTTTCTTTTCTTTTCTT                          |
| <i>C</i>      | AAGAAAAGAAAAGAAAAGAA                          |
| <i>S8Ha'</i>  | GGGTGGGTGG <i>TCCTAGGAATCCTGATGTGA</i> GTGGGT |
| <i>Ha</i>     | TCACATCAGGATTCCTAGGA                          |
| <i>S8Hb'</i>  | GGGTGGGTGG <i>TAAGAAGATGAGGCATAGCA</i> GTGGGT |
| <i>Hb</i>     | TGCTATGCCTCATCTTCTTA                          |
| <i>S8Hc'</i>  | GGGTGGGTGG <i>AGAAGTCCACCACGAGTCTAGTGGGT</i>  |
| <i>Hc</i>     | TCCTCACAATACCGCAGAGT                          |
| <i>S8Hd'</i>  | GGGTGGGTGG <i>TCCTGGTTATCGCTGGATGT</i> GTGGGT |
| <i>Hd</i>     | ACATCCAGCGATAACCAGGA                          |
| <i>5HT1</i>   | tTCACATCAGGATTCCTAGGA                         |
| <i>5HT2</i>   | ttTCACATCAGGATTCCTAGGA                        |
| <i>5HT4</i>   | tttTCACATCAGGATTCCTAGGA                       |
| <i>5HT6</i>   | ttttTCACATCAGGATTCCTAGGA                      |
| <i>5HT8</i>   | ttttttTCACATCAGGATTCCTAGGA                    |

|              |                                            |
|--------------|--------------------------------------------|
| <i>5HT10</i> | ttttttttTCACATCAGGATTCCTAGGA               |
| <i>3HT1</i>  | TCACATCAGGATTCCTAGGA <sub>t</sub>          |
| <i>3HT2</i>  | TCACATCAGGATTCCTAGGA <sub>tt</sub>         |
| <i>3HT4</i>  | TCACATCAGGATTCCTAGGA <sub>ttt</sub>        |
| <i>3HT6</i>  | TCACATCAGGATTCCTAGGA <sub>ttttt</sub>      |
| <i>3HT8</i>  | TCACATCAGGATTCCTAGGA <sub>ttttttt</sub>    |
| <i>3HT10</i> | TCACATCAGGATTCCTAGGA <sub>ttttttttt</sub>  |
| <i>5HA1</i>  | aTCACATCAGGATTCCTAGGA                      |
| <i>5HA2</i>  | aaTCACATCAGGATTCCTAGGA                     |
| <i>5HA4</i>  | aaaaTCACATCAGGATTCCTAGGA                   |
| <i>5HA6</i>  | aaaaaaTCACATCAGGATTCCTAGGA                 |
| <i>5HA8</i>  | aaaaaaaaTCACATCAGGATTCCTAGGA               |
| <i>5HA10</i> | aaaaaaaaaaTCACATCAGGATTCCTAGGA             |
| <i>3HA1</i>  | TCACATCAGGATTCCTAGGA <sub>a</sub>          |
| <i>3HA2</i>  | TCACATCAGGATTCCTAGGA <sub>aa</sub>         |
| <i>3HA4</i>  | TCACATCAGGATTCCTAGGA <sub>aaaa</sub>       |
| <i>3HA6</i>  | TCACATCAGGATTCCTAGGA <sub>aaaaaa</sub>     |
| <i>3HA8</i>  | TCACATCAGGATTCCTAGGA <sub>aaaaaaaa</sub>   |
| <i>3HA10</i> | TCACATCAGGATTCCTAGGA <sub>aaaaaaaaaa</sub> |
| <i>5ST1</i>  | tAAGAAAAGAAAAGAAAAGAA                      |
| <i>5ST2</i>  | ttAAGAAAAGAAAAGAAAAGAA                     |
| <i>5ST4</i>  | tttAAGAAAAGAAAAGAAAAGAA                    |
| <i>5ST6</i>  | ttttAAGAAAAGAAAAGAAAAGAA                   |
| <i>5ST8</i>  | tttttAAGAAAAGAAAAGAAAAGAA                  |
| <i>5ST10</i> | ttttttAAGAAAAGAAAAGAAAAGAA                 |
| <i>3ST1</i>  | AAGAAAAGAAAAGAAAAGAA <sub>t</sub>          |
| <i>3ST2</i>  | AAGAAAAGAAAAGAAAAGAA <sub>tt</sub>         |
| <i>3ST4</i>  | AAGAAAAGAAAAGAAAAGAA <sub>ttt</sub>        |
| <i>3ST6</i>  | AAGAAAAGAAAAGAAAAGAA <sub>ttttt</sub>      |

|              |                                   |
|--------------|-----------------------------------|
| <i>3ST8</i>  | AAGAAAAGAAAAGAAAAGAAttttttt       |
| <i>3ST10</i> | AAGAAAAGAAAAGAAAAGAAttttttttt     |
| <i>M1</i>    | ACACATCAGGATTCCTAGGA              |
| <i>M2</i>    | TGACATCAGGATTCCTAGGA              |
| <i>M3</i>    | TCTCATCAGGATTCCTAGGA              |
| <i>M4</i>    | TCAGATCAGGATTCCTAGGA              |
| <i>M5</i>    | TCAC TTCAGGATTCCTAGGA             |
| <i>M6</i>    | TCACAACAGGATTCCTAGGA              |
| <i>M11</i>   | TCACATCAGG TTCCTAGGA              |
| <i>M16</i>   | TCACATCAGGATTCCAGGA               |
| <i>M20</i>   | TCACATCAGGATTCCTAGGT              |
| <i>R6</i>    | TCACAT                            |
| <i>R7</i>    | TCACATC                           |
| <i>R9</i>    | TCACATCA                          |
| <i>R10</i>   | TCACATCAG                         |
| <i>R11</i>   | TCACATCAGG                        |
| <i>R16</i>   | TCACATCAGGATTCC                   |
| <i>R19</i>   | TCACATCAGGATTCCTAGG               |
| <i>L6</i>    | CTAGGA                            |
| <i>L7</i>    | CCTAGGA                           |
| <i>L9</i>    | TTCCTAGGA                         |
| <i>L10</i>   | ATTCCTAGGA                        |
| <i>L11</i>   | GATTCCTAGGA                       |
| <i>L16</i>   | ATCAGGATTCCTAGGA                  |
| <i>L19</i>   | CACATCAGGATTCCTAGGA               |
| <i>RT5</i>   | TCACATCAGGttttt                   |
| <i>RT10</i>  | TCACATCAGGttttttttt               |
| <i>RT20</i>  | TCACATCAGGttttttttttttttttt       |
| <i>RT30</i>  | TCACATCAGGttttttttttttttttttttttt |

|              |                                                |
|--------------|------------------------------------------------|
| <i>S8Ra'</i> | GGGTGGGTGGT <b>TAATAATATCCAGATAGTT</b> GTGGGT  |
| <i>Ra</i>    | AACTATCTGGATATTATTAA                           |
| <i>S8Rb'</i> | GGGTGGGTGGT <b>CCTGAGACACCTATCTCAT</b> GTGGGT  |
| <i>Rb</i>    | ATGAGATAGGTGTCTCAGGA                           |
| <i>S8Rc'</i> | GGGTGGGTGGT <b>TAATAATATACCTATCTCAT</b> GTGGGT |
| <i>Rc</i>    | ATGAGATAGGTATATTATTA                           |
| <i>S8Rd'</i> | GGGTGGGTGGT <b>CCTATGACTCTCATTGTGAGT</b> GGGT  |
| <i>Rd</i>    | TCACAATGAGAGTCATAGGA                           |
| <i>S8Re'</i> | GGGTGGGTGGT <b>CATTACAGTCCACATAGTT</b> GTGGGT  |
| <i>Re</i>    | AACTATGTGGACTGTAATGA                           |
| <i>S8Rf'</i> | GGGTGGGTGGT <b>CCTATGACTTAGTTTGTGAGT</b> GGGT  |
| <i>Rf</i>    | TCACAAACTAAGTCATAGGA                           |
| <i>5RT1</i>  | tAACTATCTGGATATTATTAA                          |
| <i>5RT2</i>  | ttAACTATCTGGATATTATTAA                         |
| <i>5RT4</i>  | ttttAACTATCTGGATATTATTAA                       |
| <i>5RT6</i>  | tttttAACTATCTGGATATTATTAA                      |
| <i>5RT8</i>  | ttttttAACTATCTGGATATTATTAA                     |
| <i>5RT10</i> | tttttttAACTATCTGGATATTATTAA                    |
| <i>3RT1</i>  | AACTATCTGGATATTATTAA <b>t</b>                  |
| <i>3RT2</i>  | AACTATCTGGATATTATTAA <b>tt</b>                 |
| <i>3RT4</i>  | AACTATCTGGATATTATTAA <b>tttt</b>               |
| <i>3RT6</i>  | AACTATCTGGATATTATTAA <b>tttttt</b>             |
| <i>3RT8</i>  | AACTATCTGGATATTATTAA <b>ttttttt</b>            |
| <i>3RT10</i> | AACTATCTGGATATTATTAA <b>tttttttt</b>           |
| <i>5RA1</i>  | aAACTATCTGGATATTATTAA                          |
| <i>5RA2</i>  | aaAACTATCTGGATATTATTAA                         |
| <i>5RA4</i>  | aaaaAACTATCTGGATATTATTAA                       |
| <i>5RA6</i>  | aaaaaaAACTATCTGGATATTATTAA                     |
| <i>5RA8</i>  | aaaaaaaaAACTATCTGGATATTATTAA                   |

|              |                                 |
|--------------|---------------------------------|
| <i>5RA10</i> | aaaaaaaaA ACTATCTGGATATTATTAA   |
| <i>3RA1</i>  | A ACTATCTGGATATTATTAAa          |
| <i>3RA2</i>  | A ACTATCTGGATATTATTAAaa         |
| <i>3RA4</i>  | A ACTATCTGGATATTATTAAaaaa       |
| <i>3RA6</i>  | A ACTATCTGGATATTATTAAaaaaaa     |
| <i>3RA8</i>  | A ACTATCTGGATATTATTAAaaaaaaaa   |
| <i>3RA10</i> | A ACTATCTGGATATTATTAAaaaaaaaaaa |
| <i>MR1</i>   | TACTATCTGGATATTATTAA            |
| <i>MR2</i>   | ATCTATCTGGATATTATTAA            |
| <i>MR3</i>   | AA GTATCTGGATATTATTAA           |
| <i>MR4</i>   | AAC AATCTGGATATTATTAA           |
| <i>MR5</i>   | AACT TCTGGATATTATTAA            |
| <i>MR6</i>   | AACTA ACTGGATATTATTAA           |
| <i>MR7</i>   | AACTAT GTGGATATTATTAA           |
| <i>MR9</i>   | AACTATCT CGATATTATTAA           |
| <i>MR10</i>  | AACTATCTG CATATTATTAA           |
| <i>MR11</i>  | AACTATCTGG TTATTATTAA           |
| <i>MR16</i>  | AACTATCTGGATATT TTAA            |
| <i>MR20</i>  | AACTATCTGGATATTATTAT T          |
| <i>D6</i>    | AACTAT                          |
| <i>D7</i>    | AACTATC                         |
| <i>D9</i>    | AACTATCTG                       |
| <i>D10</i>   | AACTATCTGG                      |
| <i>D11</i>   | AACTATCTGGA                     |
| <i>D16</i>   | AACTATCTGGATATTA                |
| <i>D19</i>   | AACTATCTGGATATTATTA             |
| <i>RD5</i>   | AACTATCTGGAtttt                 |
| <i>RD10</i>  | AACTATCTGGAtttttttt             |
| <i>RD20</i>  | AACTATCTGGAtttttttttttttt       |

|             |                                                                                       |
|-------------|---------------------------------------------------------------------------------------|
| <i>RD30</i> | AACTATCTGGAAttttttttttttttttttttttttttttt                                             |
| <i>Rv</i>   | AACTATCTGGAATGAT                                                                      |
| <i>FP</i>   | ACCGAACATGGAGAACATCACA                                                                |
| <i>RP</i>   | GAGGACAAACGGGCAACATAC                                                                 |
| <i>SC</i>   | GGACCCTGCACCGAACATGGAGAACATCACATCAGGATTCTAGG<br>ACCCCTGCTCGTGTTACAGGCGGGGTTTTTC       |
| <i>Pa</i>   | Phosphate-<br>CTGATGTGATGTTCTTTCCTTCTCATGTTTAGATAGTTCGAGACAC<br>TGACATTTGGTCCTAGGAATC |
| <i>BL</i>   | ATCATTGTAGATAGTTCGAGACACTGACA                                                         |

**Table S2.** The sequences of three double-stranded DNA targets (*HF*, *EF* and *NF*) derived from genes of Hepatitis B, Ebola and Nova viruses, respectively.

| Name      | Information (5' to 3')                                                                                                                                                                                                                                                                                                                                                                                 |
|-----------|--------------------------------------------------------------------------------------------------------------------------------------------------------------------------------------------------------------------------------------------------------------------------------------------------------------------------------------------------------------------------------------------------------|
| <i>HF</i> | AATCTCCTCGAGGACTGGGGACCCTGCACCGAACATGGAGAA<br>CATCACATCAGGATTCTAGGACCCCTGCTCGTGTTACAGGCG<br>GGGTTTTTCTTGTTGACAAGAATCCTCACAATACCGCAGAGTC<br>TAGACTCGTGGTGGACTTCTCTCAATTTTCTAGGGGGATCACC<br>CGTGTGTCTTGGCCAAAATTCGCAGTCCCCAACCTCCAATCAC<br>TCACCAACCTCCTGTCCTCCAATTTGTCCTGGTTATCGCTGGAT<br>GTGTCTGCGGCGTTTTATCATATTCCTCTTCATCCTGCTGCTAT<br>GCCTCATCTTCTTATTGGTTCTTCTGGATTATCAGGGTATGTTG<br>CCCGTTTGTCTCT |
| <i>EF</i> | CTTCAGCTCACACCCCTTGAGAGAGCCGGTCAATGCAACGGA<br>GGACCCGTCCAGTGGCTACTATTCTACCACAATTAGATATCAG<br>GCTACCGGTTTTGGAACCAATGAGACGGAGTACTTGTTTCGAG<br>GTTGACAATTTGACCTACGTCCAATTGAATCAAGATTCACGC<br>CACAGTTTTTGCTCCAGCTGAATGAGACAATATATGCAAGTGG<br>GAAAAGGAGCAACACCACGGGAAAATAATTTGGAAGGTCA<br>ACCCCGAAATTGATACAACAATCGGGGAGTGGGCCTTCTGGG                                                                        |

|           |                                                                                                                                                                                                                                                                                                                                                                                             |
|-----------|---------------------------------------------------------------------------------------------------------------------------------------------------------------------------------------------------------------------------------------------------------------------------------------------------------------------------------------------------------------------------------------------|
|           | AAACTAAAAAACCTCACTAGAAAAATTCGCAGT                                                                                                                                                                                                                                                                                                                                                           |
| <i>NF</i> | TACTCCTGATTTTGAGTTCACTTATTTAGTGCCACCTTCTGTTG<br>AATCTAAAACCAAGCCTTTTTCCTTACCTATTTTAACCCTTTCT<br>GAGCTCACAAATTCGAGGTTCCCAGTCCCCATCGATTGCTTT<br>TCACCGCCCAGAATAATGTGTTGCAGGTGCAGTGTCAAATG<br>GCAGGTGTACTTGTATGGTGAGTTACAAGGCACAACCCAGT<br>TGCTCCCATCTGGCATCTGTGCATTCAGAGGACGGGTGACAGC<br>ACAAATTAACCAACGTGACAGGTGGCACATGCAACTGCAAAA<br>CCTCAATGGTACAACATATGACCCAACTGATGATGTGCCAGC<br>CCCGCTGG |

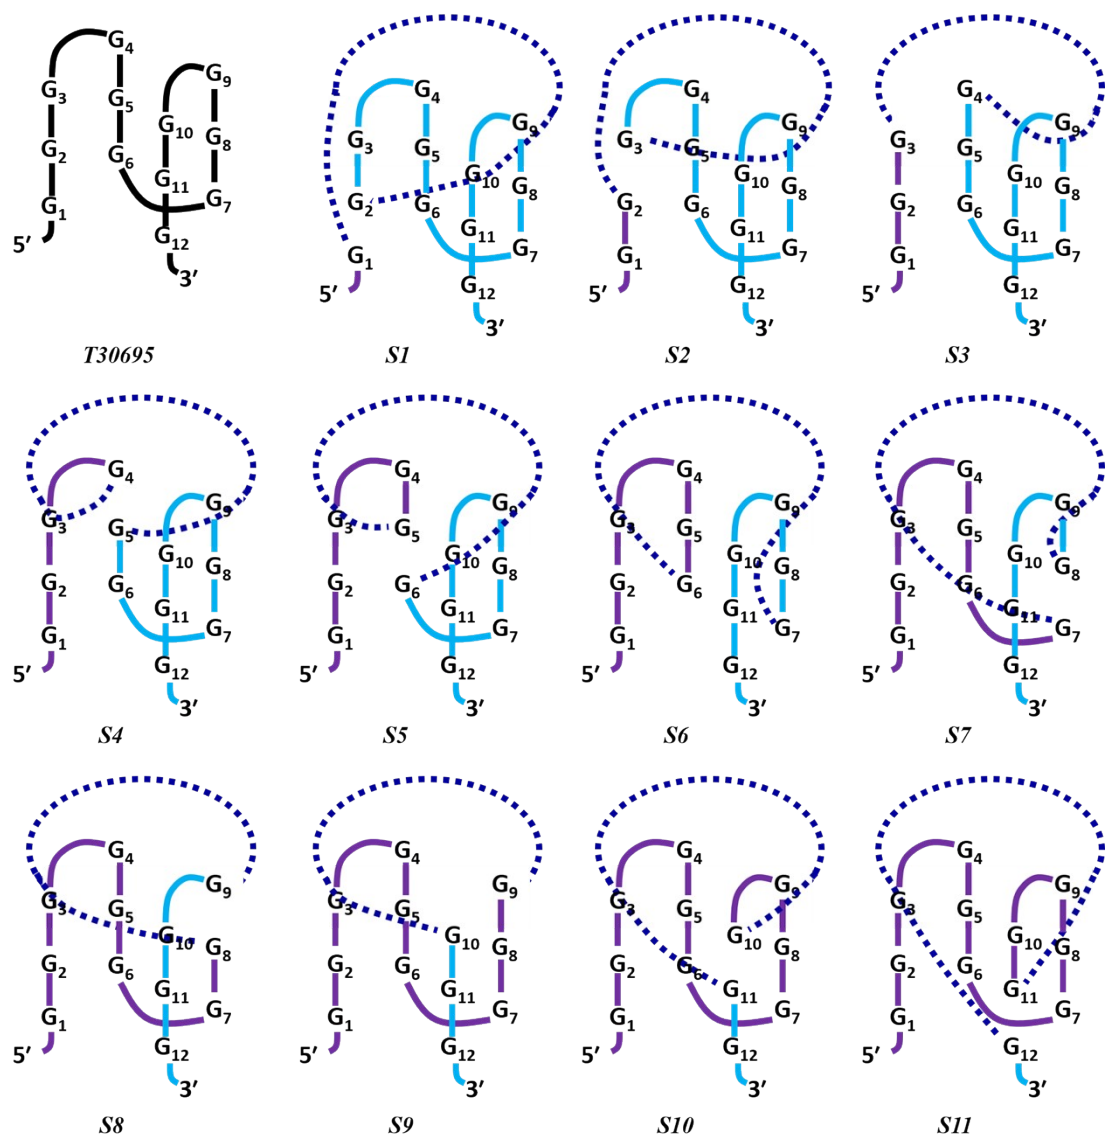

**Figure S1.** Eleven Intra-SG structures (S1-S11) derived from T30695 G-quadruplex.

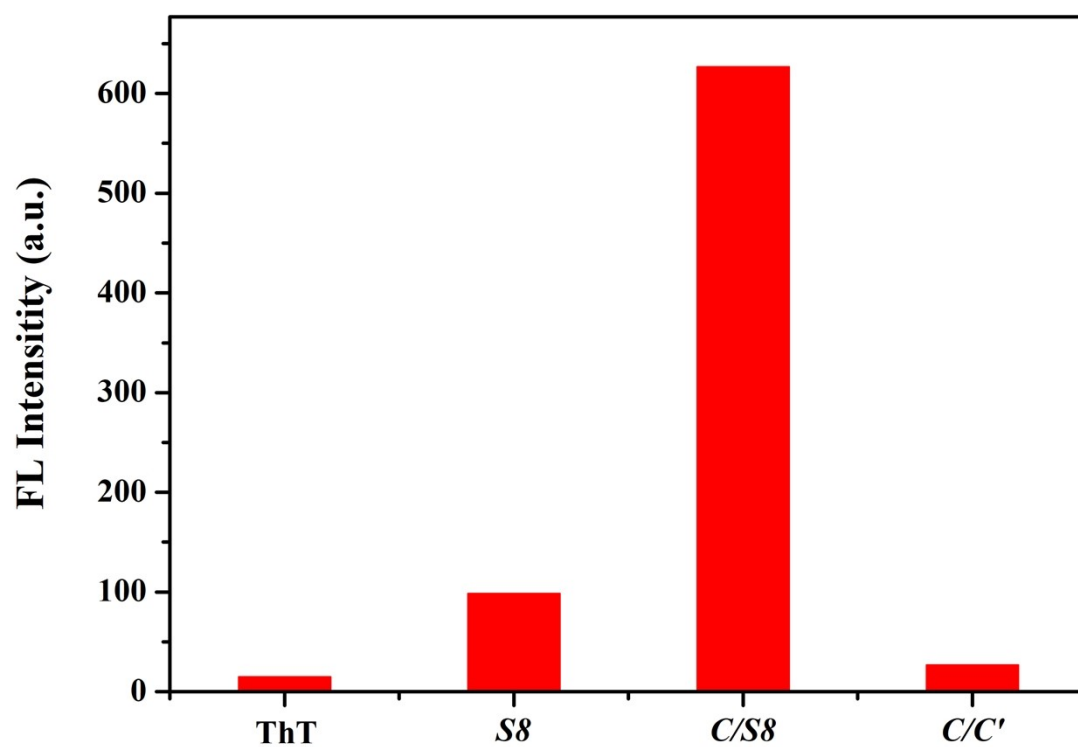

**Figure S2.** Fluorescence responses of ThT with different types of DNA strands (*S8*, *C/S8* or *C/C'*). The concentration of each DNA strand and ThT was 300 nM and 5  $\mu$ M, respectively, in Tris/K buffer.

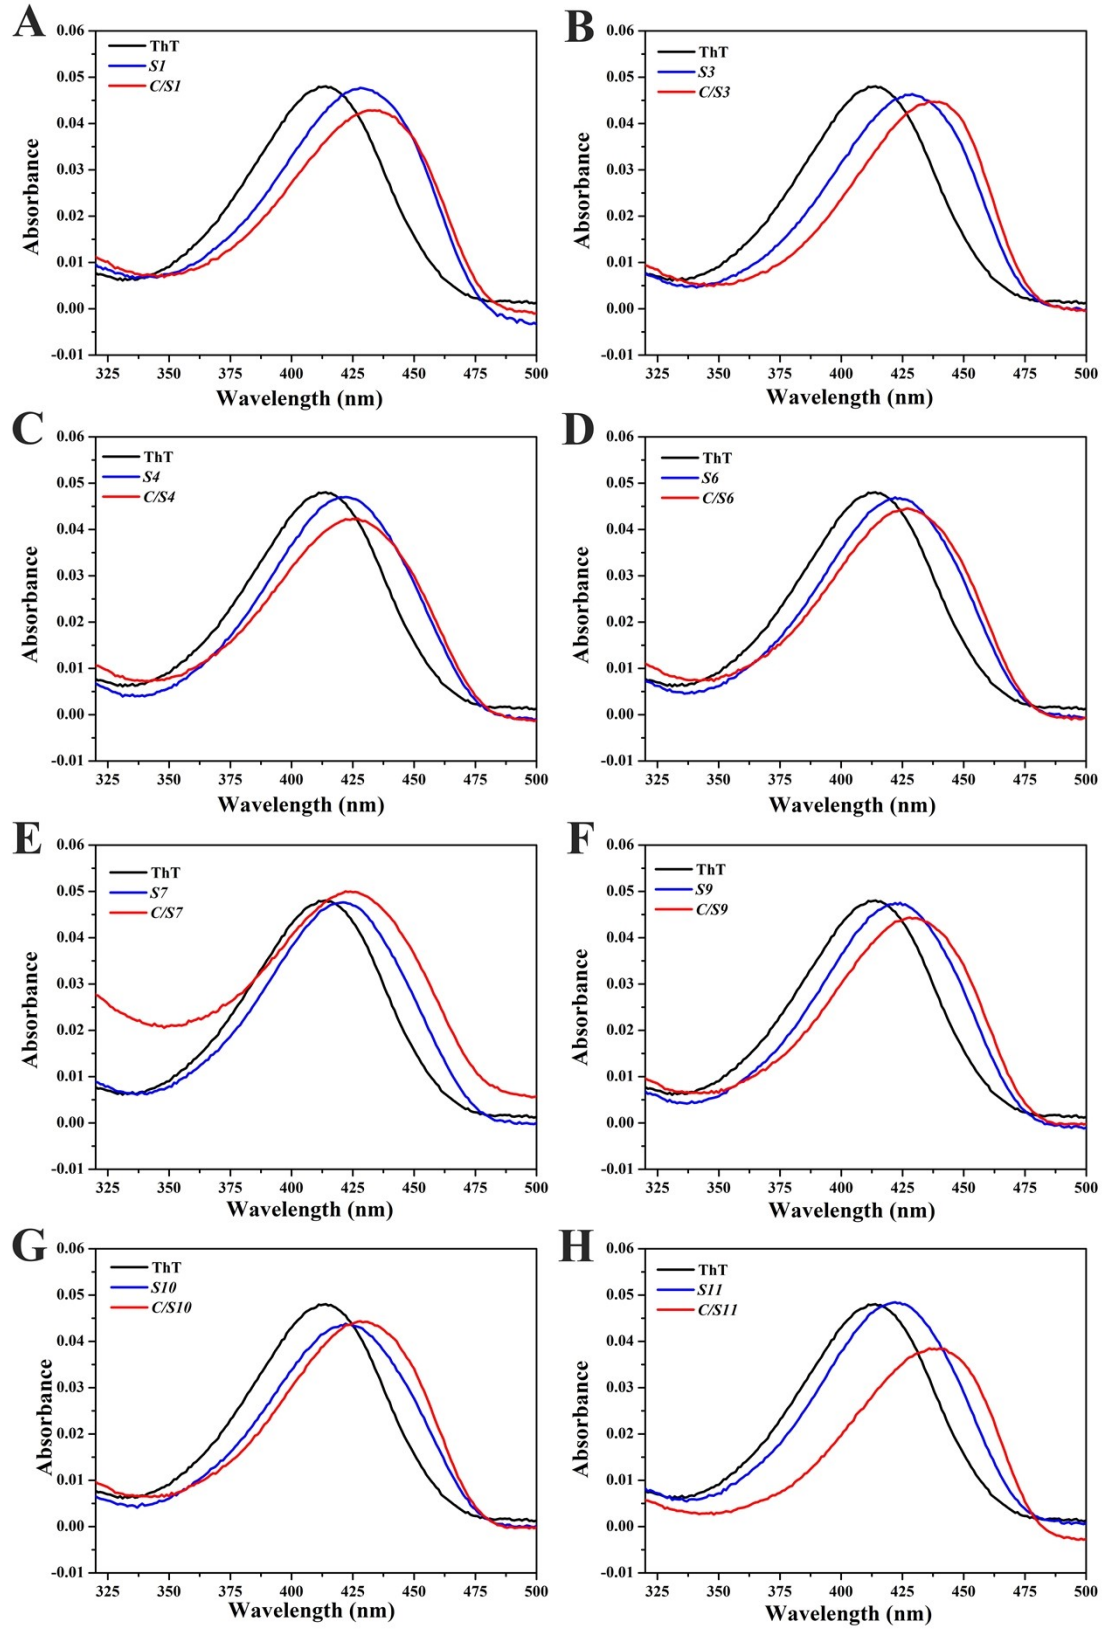

**Figure S3.** (A-H) UV-vis spectra of ThT incubated with different Intra-SG strands (blue curves) or C/Intra-SG hybrids (red curves). The black curves represent ThT only. The final concentrations of ThT and DNA were 2.5  $\mu$ M and 5  $\mu$ M, respectively, in

Tris/K buffer.

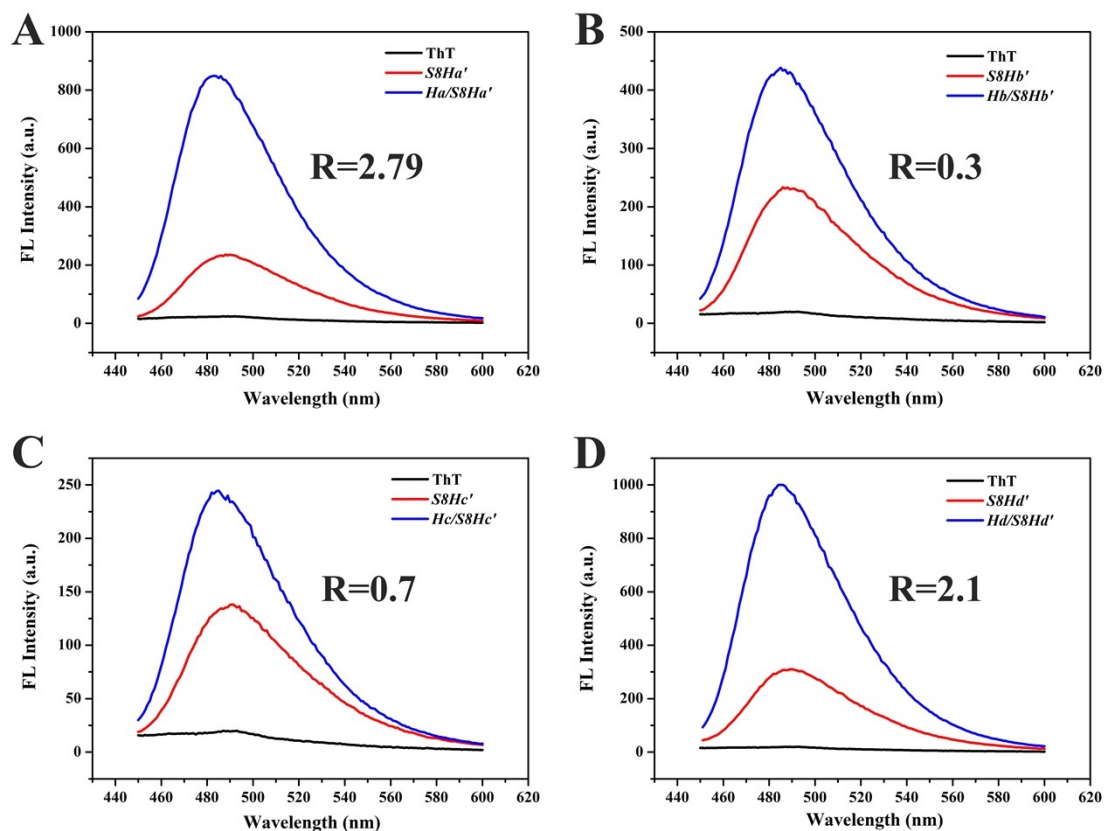

**Figure S4.** Fluorescence spectra of different ThT/Intra-SG systems. Four new Intra-SG structures (*S8Ha'*, *S8Hb'*, *S8Hc'* and *S8Hd'*) derived from *S8* were designed for recognizing four short DNA segments (*Ha*, *Hb*, *Hc* and *Hd*, respectively) from HBV gene. The calculated R values were indicated in the graphs. The concentration of each DNA strand and ThT in Tris/K buffer were 300 nM and 5  $\mu$ M, respectively.

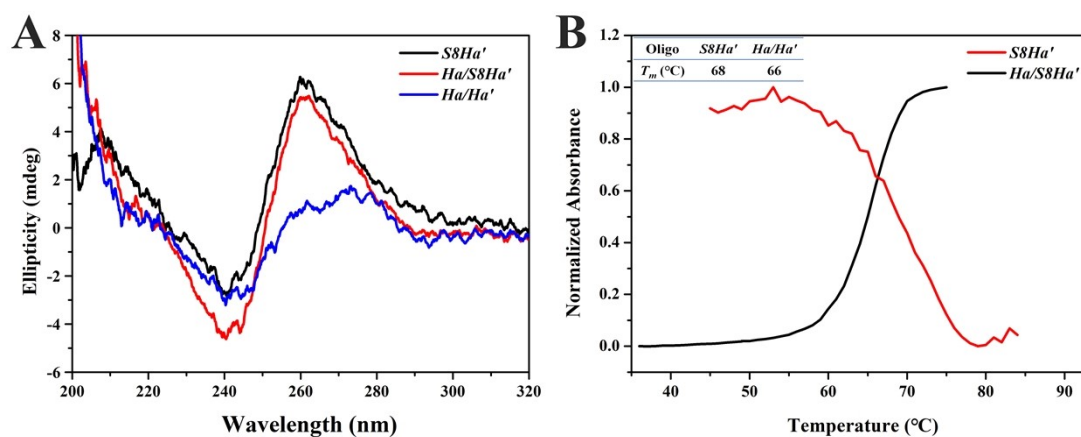

**Figure S5.** (A) CD spectra of *S8Ha'* without (black curve) or with (red curve) *Ha*. The blue curve represents the duplex *Ha/Ha'*. The final concentration of each indicated strand in Tris/K buffer was 7  $\mu$ M. (B) Normalized UV-melting profiles of *S8Ha'* at 295 nm (red curve) and duplex *Ha/Ha'* at 260 nm (black curve). The corresponding  $T_m$  values were shown in the inserted table. The concentration of each DNA strand in Tris/K buffer was 2  $\mu$ M.

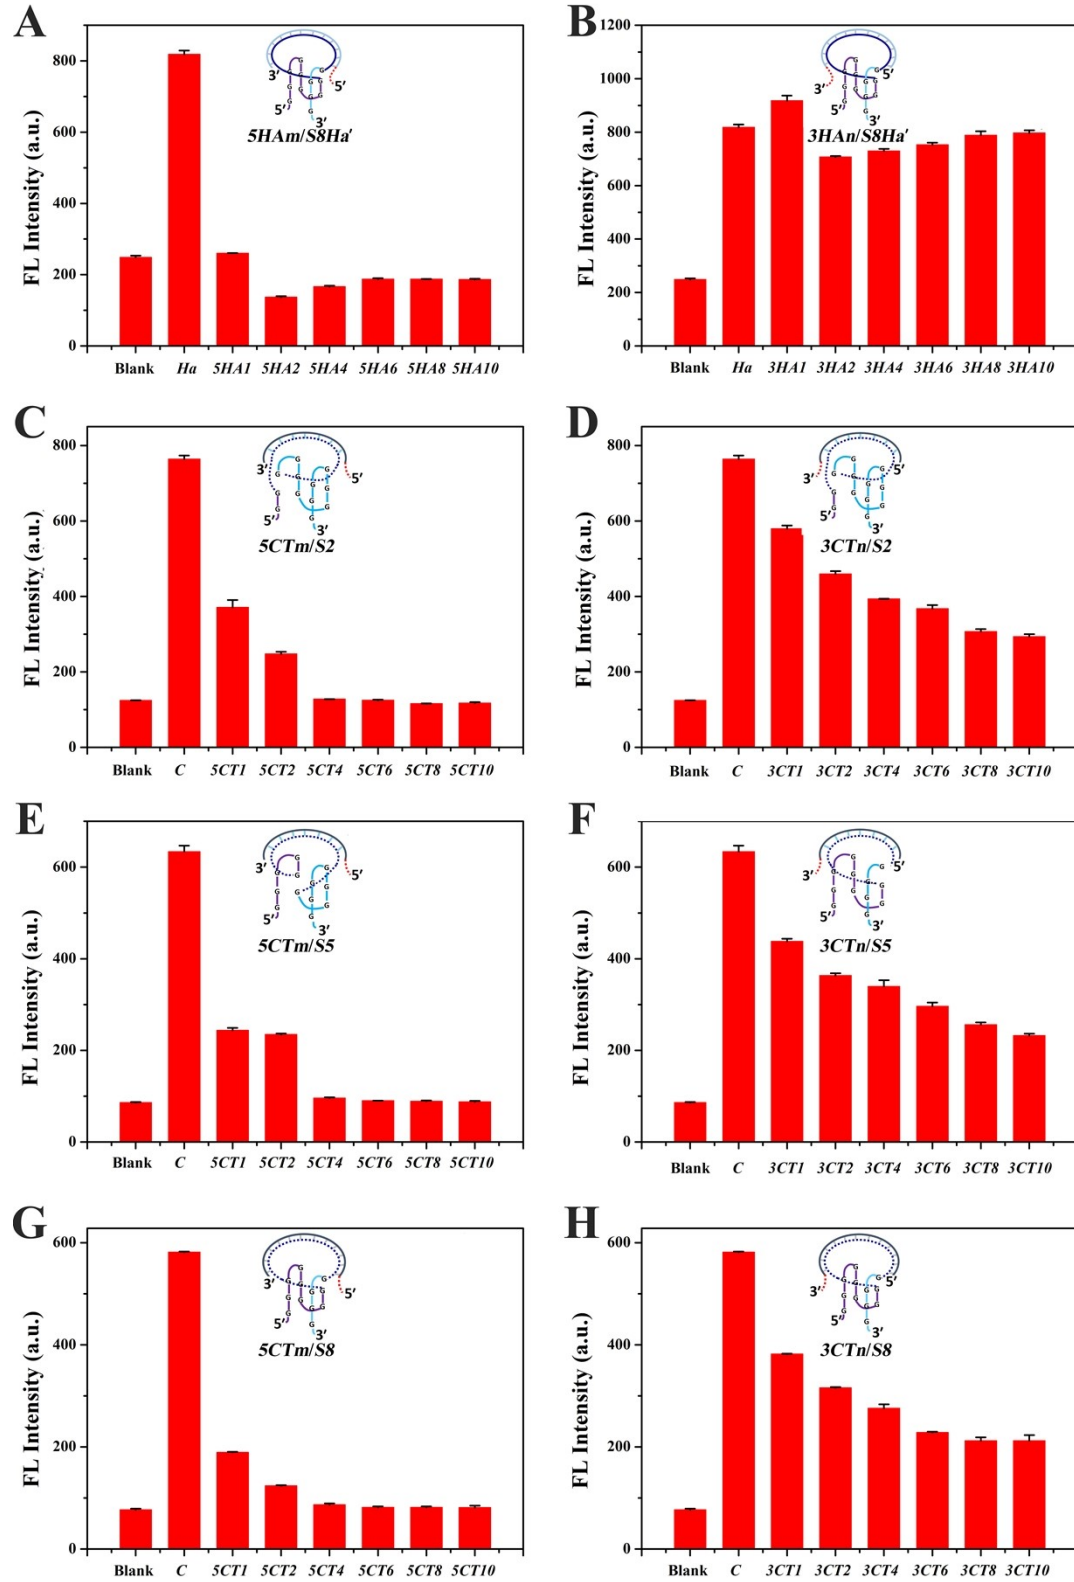

**Figure S6.** (A-B) The fluorescence intensity of ThT/S8Ha' (Blank) in the presence of Ha or different Ha variants generated through grafting different numbers ( $m, n$ ) of A bases at the 5' (5HAM, A) or 3' end (3HAN, B). The value. (C-H) The fluorescence intensity of ThT/S2 (Blank, C-D), ThT/S5 (Blank, E-F), and ThT/S8 (Blank, G-H), in

the presence of *C* or different *C* variants generated through grafting different numbers ( $m$ ,  $n$ ) of T bases at the 5' ( $5CT_m$ , C, E and G) or 3' end ( $3CT_n$ , D, F and H). The concentrations of ThT and each DNA strand were 5  $\mu$ M and 300 nM, respectively, in Tris/K buffer.

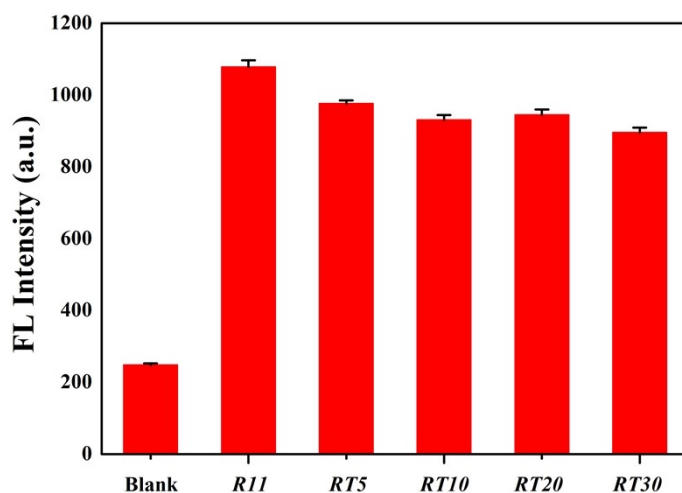

**Figure S7.** The fluorescence intensity of ThT/*S8Ha'* with *R11* or *R11* variants generated through grafting different numbers ( $k$ ) of T bases at the 3' terminus ( $RTk$ ). The concentration of each DNA strand and ThT was 300 nM and 5  $\mu$ M, respectively, in Tris/K buffer.

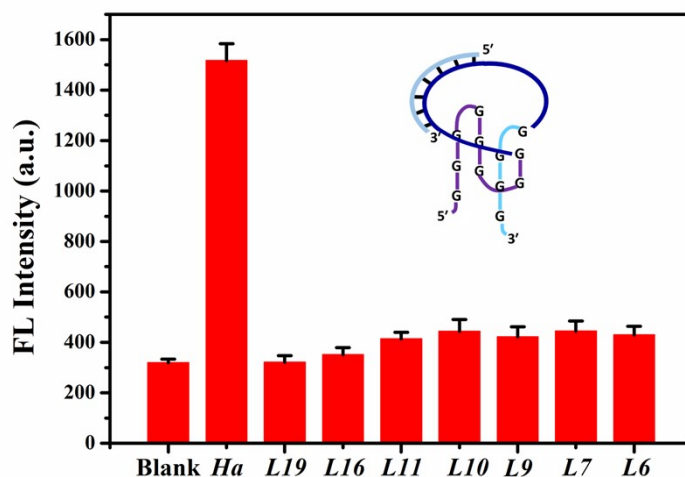

**Figure S8.** The fluorescence intensity of ThT/*S8Ha'* (Blank) in the presence of *Ha* or different *Ha* variants generated through tailoring different numbers of bases from the 5' end ( $Ly$ ). The letter “y” in  $Ly$  represents base numbers of target DNA after tailoring. A schematic diagram is inserted in each figure for illustrating the target DNA tailoring. The concentration of each DNA strand and ThT was 300 nM and 5  $\mu$ M, respectively,

in Tris/K buffer.

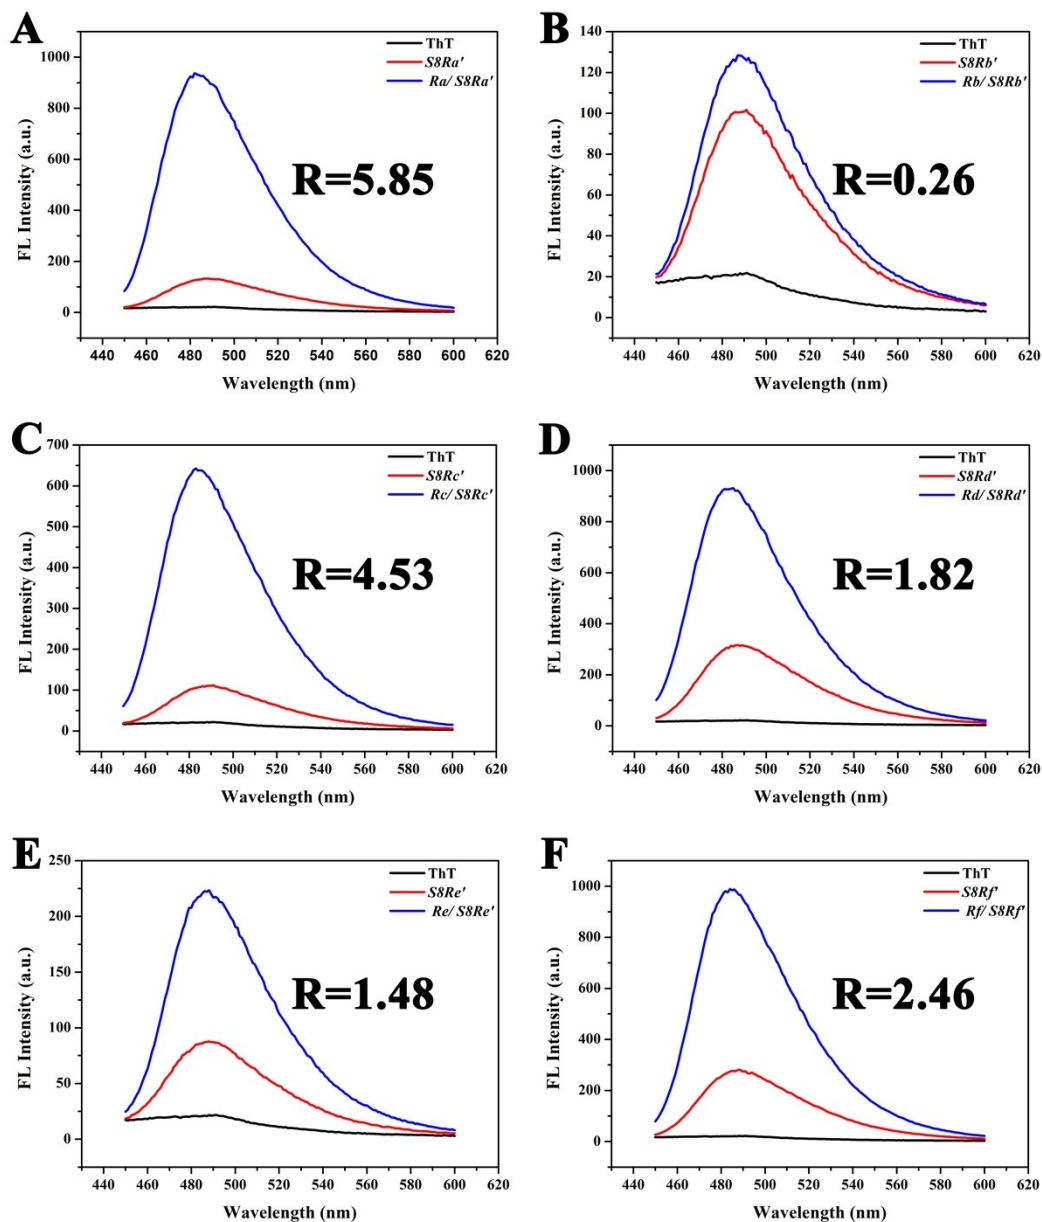

**Figure S9.** Fluorescence spectra of different ThT/Intra-SG systems. These new six Intra-SG structures (*S8Ra'*, *S8Rb'*, *S8Rc'*, *S8Rd'*, *S8Re'* and *S8Rf'*) derived from *S8* were designed for recognizing six random DNA target strands, *Ra*, *Rb*, *Rc*, *Rd*, *Re* and *Rf*, respectively. The calculated R values were indicated in the graphs. The concentration of each DNA strand and ThT was 300 nM and 5  $\mu$ M, respectively, in Tris/K buffer.

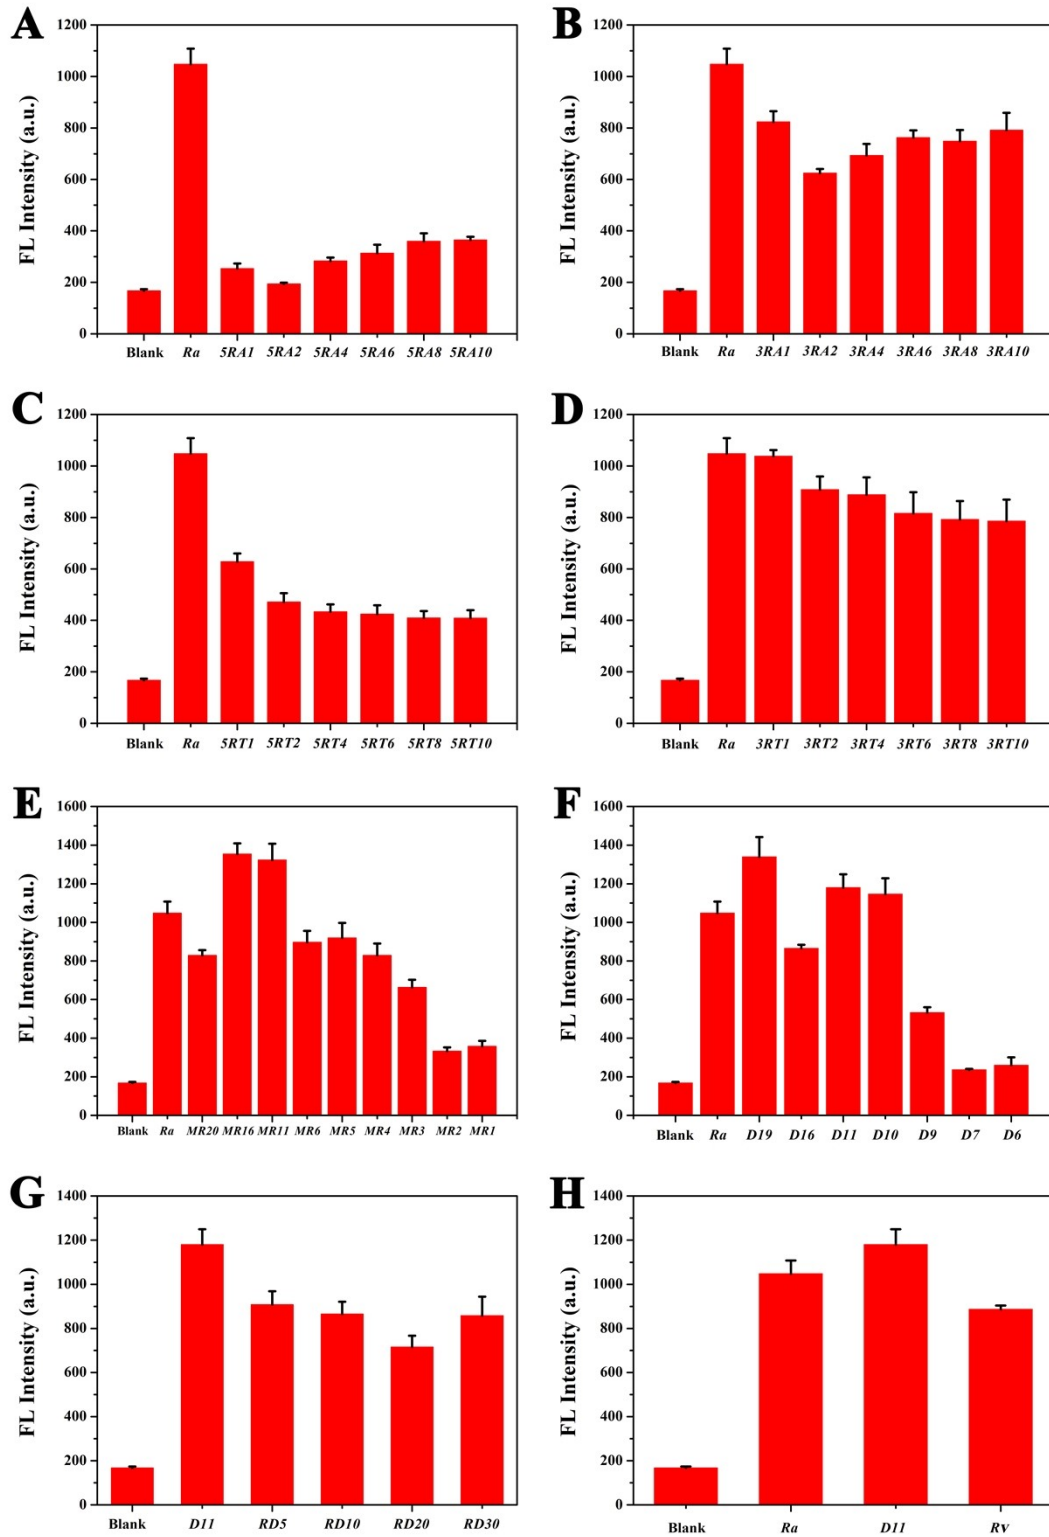

**Figure S10.** (A-D) The fluorescence intensity of ThT/*S8Ra'* (Blank) in the presence of *Ra* or different *Ra* variants generated through grafting different numbers ( $m$ ,  $n$ ) of A bases (A-B) or T bases (C-D) at the 5' ( $5RAm$ , A and C) or 3' end ( $3RAn$ , B and D), or single-base mutation ( $MRx$ , E), or tailoring different numbers of bases from the 3' end

(Dy, F). The letter “x” in *MRx* represents the mutation site from the 5' to 3' end. The letter “y” in *Dy* represents base numbers of target DNA after tailoring. (G) The fluorescence intensity of ThT/*S8Ra'* with *D11* or *D11* variants generated through grafting different numbers (*k*) of T bases at the 3' terminus (*RDk*). (H) Fluorescence intensity of ThT/*S8Ra'* without or with different targets (*Ra*, *D11* or *Rv*). The concentrations of each DNA strand and ThT were 300 nM and 5  $\mu$ M, respectively.
